# Supplementary material for: Modulation of Leukocyte Subsets Mobilization in Response to Exercise by Water Immersion Recovery
Source: Frontiers journal article supplement (doi:10.3389/fphys.2022.867362), 2022-08-16
Supplement: Data_Sheet_1.PDF [file Data_Sheet_1.PDF]

## Supplementary Material

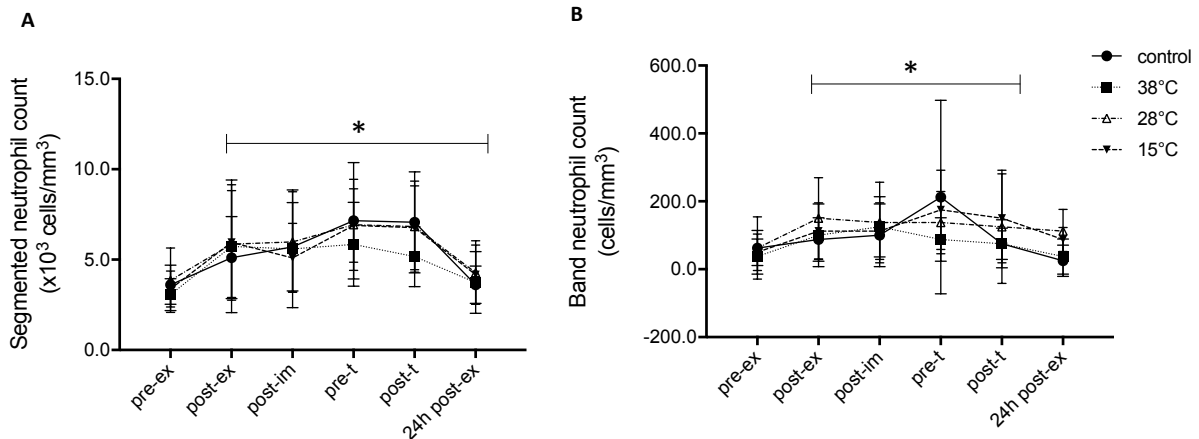

**Supplementary Figure 1.** Effect of post-exercise recovery by water immersion on segmented (A) and band neutrophil count (B). \* $P < 0.05$ , main time effect, compared to pre-ex, mixed effects model, followed by Dunnett's multiple comparison test. Pre-ex – before exercise, post-ex – immediately after exercise session, post-im - immediately post immersion, pre-t – immediately before performance test, post-t – immediately after performance tests, 24 h post-ex – 24 hours after the exercise session.

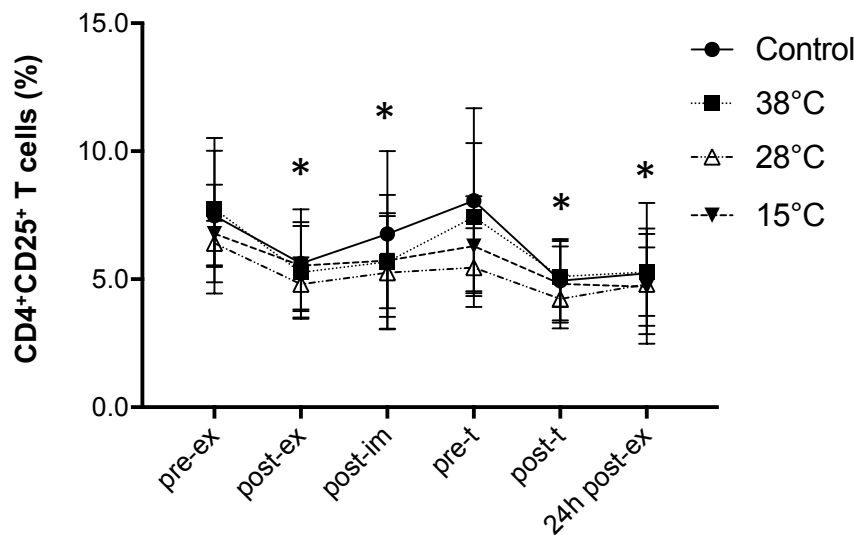

**Supplementary Figure 2.** Effect of post-exercise recovery by water immersion on the percentage of CD4<sup>+</sup>CD25<sup>+</sup> T cells. \* $P < 0.05$ , main time effect, compared to pre-ex, mixed effects model, followed by Dunnett's multiple comparison test. Pre-ex – before exercise, post-ex – immediately after exercise session, post-im - immediately post immersion, pre-t – immediately before performance test, post-t – immediately after performance tests, 24 h post-ex – 24 hours after the exercise session.
